# Supplementary material for: Syntheses, crystal structure and photophysical properties of [Sm(dbm)3(impy)] and [Tb(dbm)3(impy)] and their hybrid films
Source: Royal Society of Chemistry journal article supplement (doi:10.1039/c8nj05045g), 2019-01-01
Supplement: c8nj05045g1.pdf [file c8nj05045g1.pdf]

## Syntheses, crystal structure and photophysical properties of [Sm(dbm)<sub>3</sub>(impy)] and [Tb(dbm)<sub>3</sub>(impy)] and their hybrid films

Najmul Hasan and K. Iftikhar\*

Lanthanide Research Laboratory

Department of Chemistry

Jamia Millia Islamia, New Delhi 110 025, India.

e-mail corresponding author: [kiftikhar@jmi.ac.in](mailto:kiftikhar@jmi.ac.in) (K. Iftikhar)

### Supplementary information

**Table S1.** Selected bond lengths and angles for the complex **1**

| Bond       | Bond length (Å) | Bond            | Bond angle (°) | Bond            | Bond angle (°) |
|------------|-----------------|-----------------|----------------|-----------------|----------------|
| N(1)-Sm(1) | 2.559(3)        | O(3)-Sm(1)-O(4) | 71.68(8)       | O(2)-Sm(1)-O(6) | 74.37(9)       |
| N(2)-Sm(1) | 2.645(3)        | O(3)-Sm(1)-O(1) | 92.77(9)       | O(3)-Sm(1)-N(1) | 99.04(9)       |
| O(1)-Sm(1) | 2.358(2)        | O(4)-Sm(1)-O(1) | 80.39(9)       | O(4)-Sm(1)-N(1) | 75.36(9)       |
| O(2)-Sm(1) | 2.377(2)        | O(3)-Sm(1)-O(5) | 150.72(8)      | O(1)-Sm(1)-N(1) | 147.97(8)      |
| O(3)-Sm(1) | 2.347(2)        | O(4)-Sm(1)-O(5) | 80.03(8)       | O(5)-Sm(1)-N(1) | 80.53(9)       |
| O(4)-Sm(1) | 2.351(2)        | O(1)-Sm(1)-O(5) | 74.88(9)       | O(2)-Sm(1)-N(1) | 139.97(8)      |
| O(5)-Sm(1) | 2.365(2)        | O(3)-Sm(1)-O(2) | 85.49(9)       | O(6)-Sm(1)-N(1) | 76.95(9)       |
| O(6)-Sm(1) | 2.399(2)        | O(4)-Sm(1)-O(2) | 141.76(9)      | O(3)-Sm(1)-N(2) | 69.99(8)       |
|            |                 | O(1)-Sm(1)-O(2) | 70.27(8)       | O(4)-Sm(1)-N(2) | 116.05(8)      |
|            |                 | O(5)-Sm(1)-O(2) | 113.78(9)      | O(1)-Sm(1)-N(2) | 148.73(9)      |
|            |                 | O(3)-Sm(1)-O(6) | 139.47(8)      | O(5)-Sm(1)-N(2) | 131.85(8)      |
|            |                 | O(4)-Sm(1)-O(6) | 141.43(8)      | O(2)-Sm(1)-N(2) | 82.19(8)       |
|            |                 | O(1)-Sm(1)-O(6) | 112.04(10)     | O(6)-Sm(1)-N(2) | 72.65(9)       |
|            |                 | O(5)-Sm(1)-O(6) | 69.32(8)       | N(1)-Sm(1)-N(2) | 62.81(8)       |

**Table S2.** Selected bond lengths and angles for the complex **2**

| Bond       | Bond length (Å) | Bond            | Bond length (Å) | Bond            | Bond length (Å) |
|------------|-----------------|-----------------|-----------------|-----------------|-----------------|
| N(1)-Tb(1) | 2.515(2)        | O(2)-Tb(1)-O(1) | 72.71(7)        | O(6)-Tb(1)-O(4) | 73.68(8)        |
| N(2)-Tb(1) | 2.608(2)        | O(2)-Tb(1)-O(5) | 91.43(8)        | O(2)-Tb(1)-N(1) | 99.61(8)        |
| O(1)-Tb(1) | 2.322(2)        | O(1)-Tb(1)-O(5) | 79.59(8)        | O(1)-Tb(1)-N(1) | 74.96(8)        |
| O(2)-Tb(1) | 2.310(2)        | O(2)-Tb(1)-O(3) | 150.54(8)       | O(5)-Tb(1)-N(1) | 147.66(7)       |
| O(3)-Tb(1) | 2.330(2)        | O(1)-Tb(1)-O(3) | 79.05(8)        | O(3)-Tb(1)-N(1) | 80.61(8)        |
| O(4)-Tb(1) | 2.368(2)        | O(5)-Tb(1)-O(3) | 75.18(8)        | O(6)-Tb(1)-N(1) | 139.66(8)       |
| O(5)-Tb(1) | 2.325(2)        | O(2)-Tb(1)-O(6) | 84.79(8)        | O(4)-Tb(1)-N(1) | 77.43(8)        |
| O(6)-Tb(1) | 2.340(2)        | O(1)-Tb(1)-O(6) | 142.50(8)       | O(2)-Tb(1)-N(2) | 70.17(8)        |
|            |                 | O(5)-Tb(1)-O(6) | 71.22(7)        | O(1)-Tb(1)-N(2) | 116.98(7)       |
|            |                 | O(3)-Tb(1)-O(6) | 114.23(8)       | O(5)-Tb(1)-N(2) | 148.00(8)       |
|            |                 | O(2)-Tb(1)-O(4) | 138.96(7)       | O(3)-Tb(1)-N(2) | 132.47(8)       |
|            |                 | O(1)-Tb(1)-O(4) | 141.37(7)       | O(6)-Tb(1)-N(2) | 80.95(7)        |
|            |                 | O(5)-Tb(1)-O(4) | 113.04(8)       | O(4)-Tb(1)-N(2) | 72.19(8)        |
|            |                 | O(3)-Tb(1)-O(4) | 70.18(8)        | N(1)-Tb(1)-N(2) | 63.61(8)        |

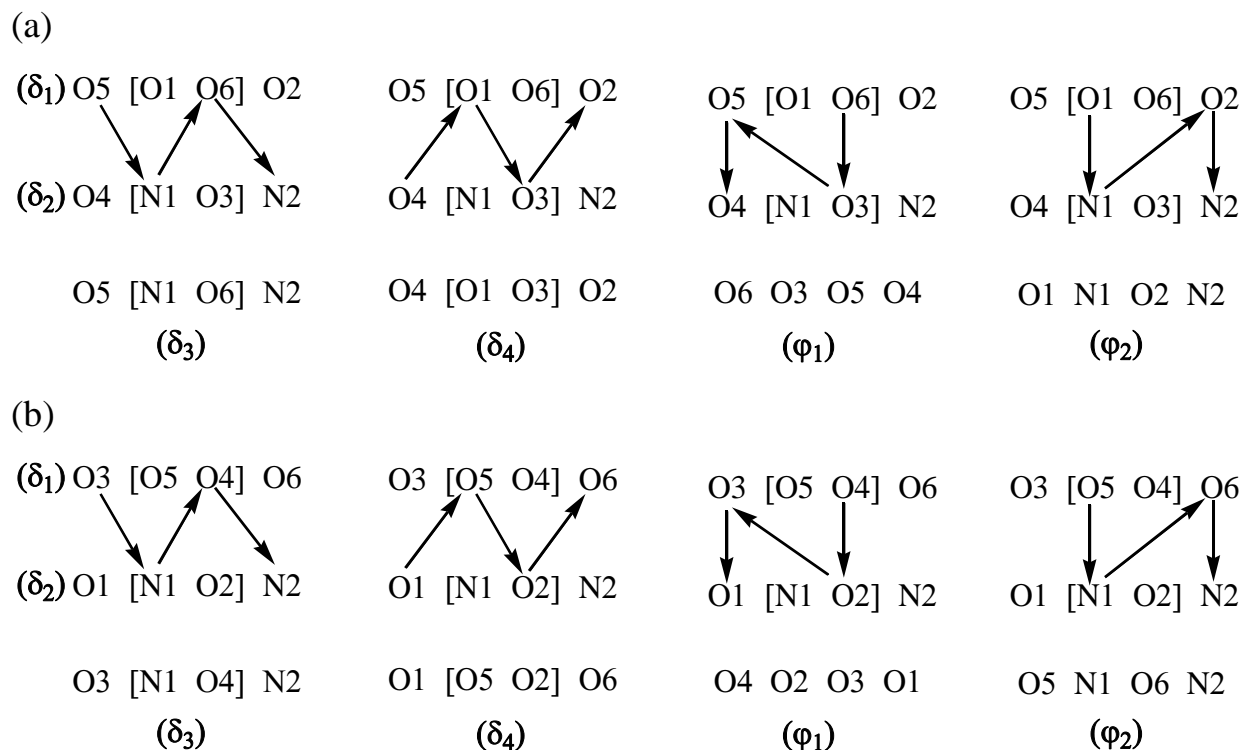**Figure S1.** Schematic representation of the dihedral planes (a) complex **1** and (b) complex **2**.

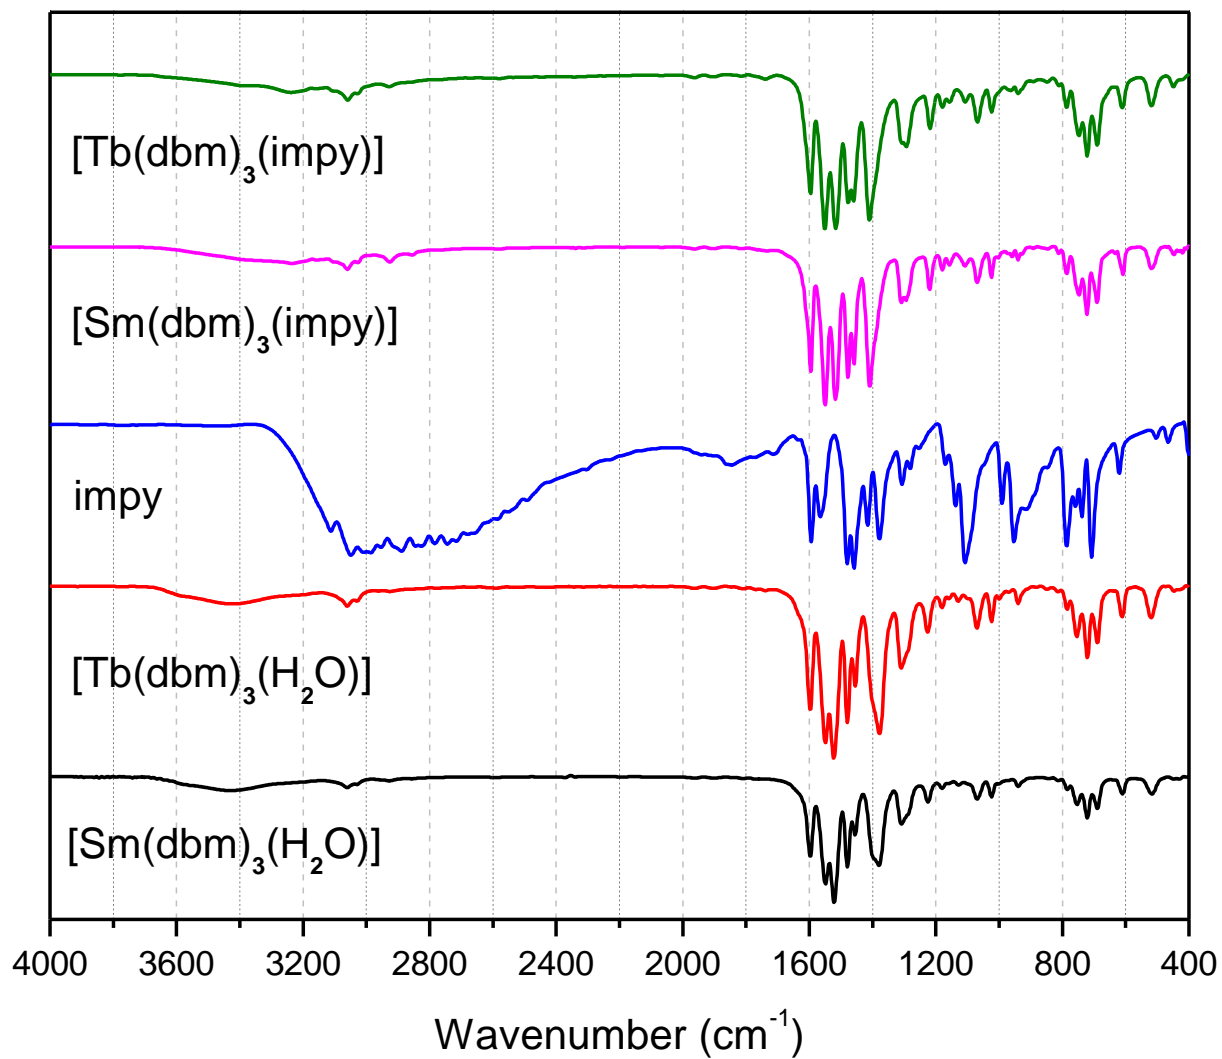

**Figure S2.** IR spectra of free impy, [Sm(dbm)<sub>3</sub>(H<sub>2</sub>O)], [Tb(dbm)<sub>3</sub>(H<sub>2</sub>O)], [Sm(dbm)<sub>3</sub>(imp)] and [Tb(dbm)<sub>3</sub>(imp)].

(a)

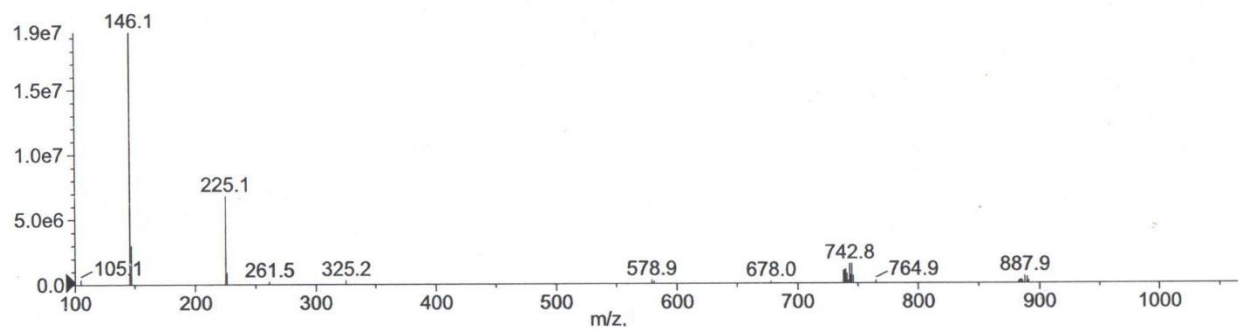

(b)

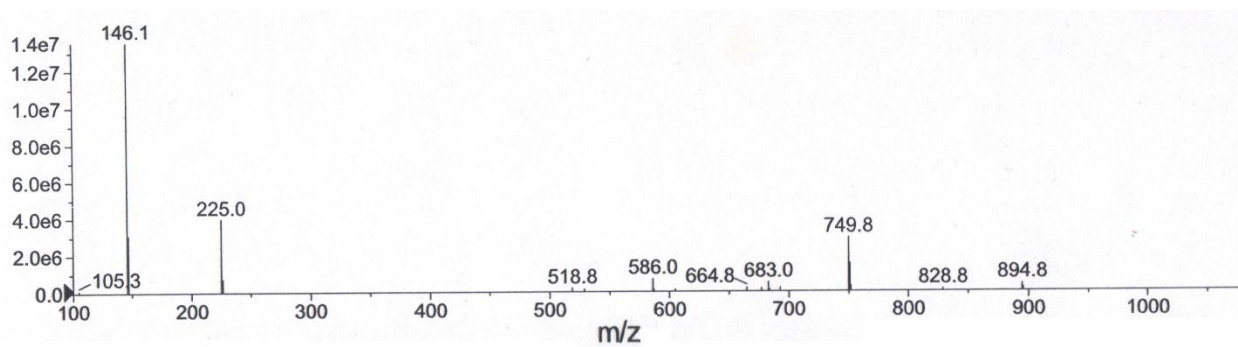

**Figure S3.** ESI-MS<sup>+</sup> spectra of (a) [Sm(dbm)<sub>3</sub>(imp)] and (b) [Tb(dbm)<sub>3</sub>(imp)].

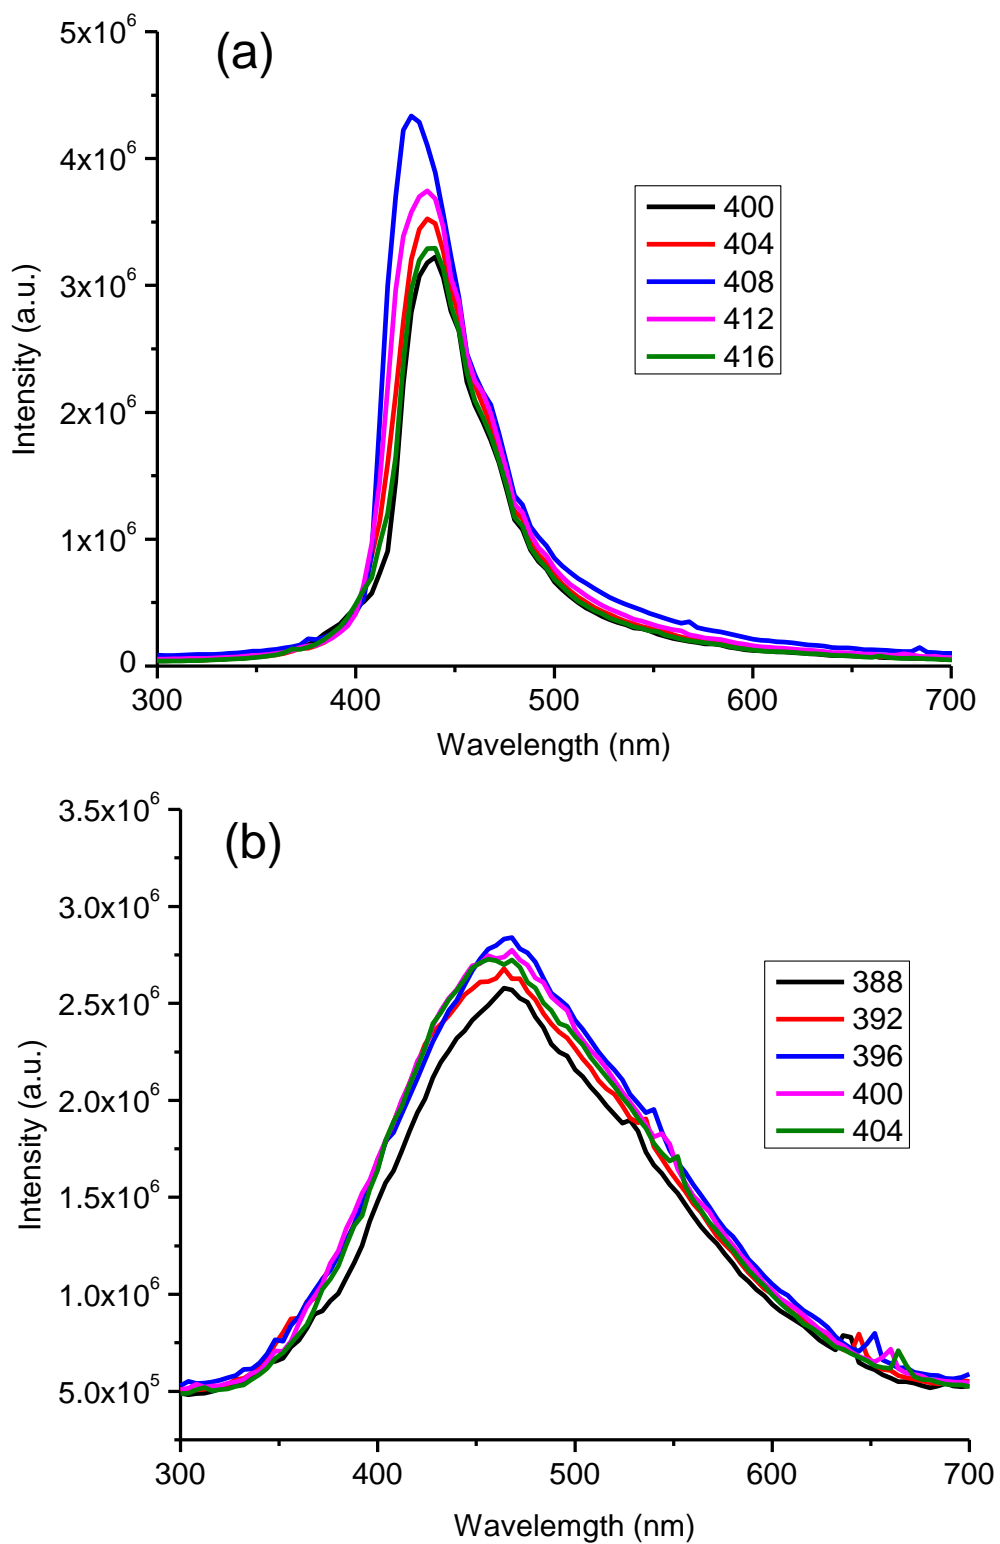

**Figure S4.** Emission spectra of (a) Hdbm and (b) impy

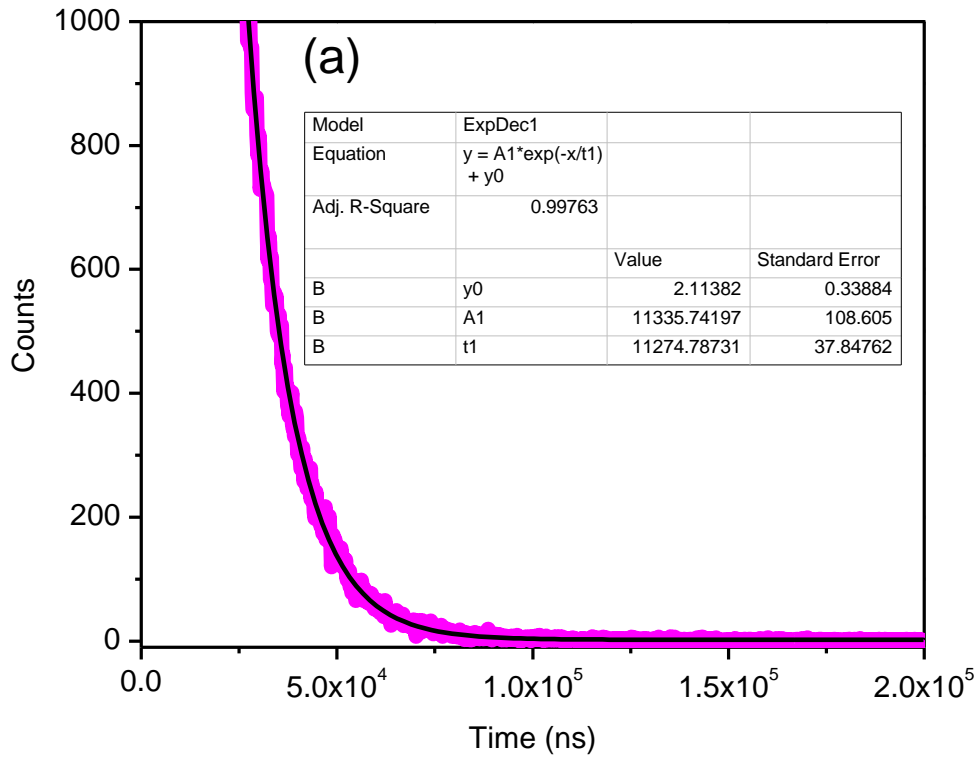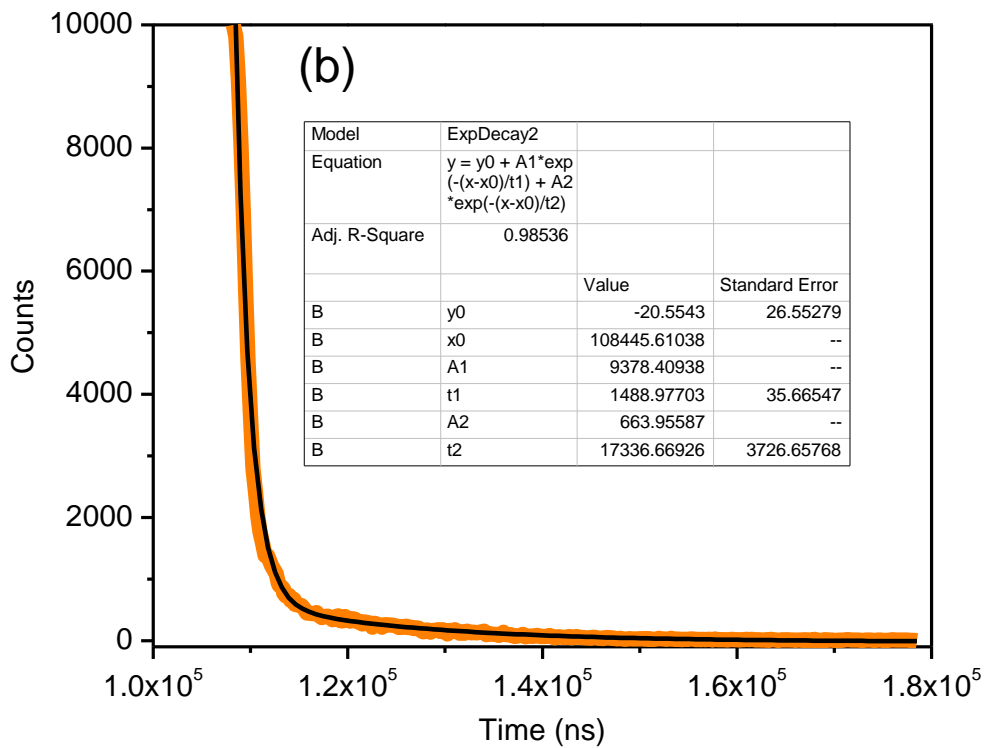

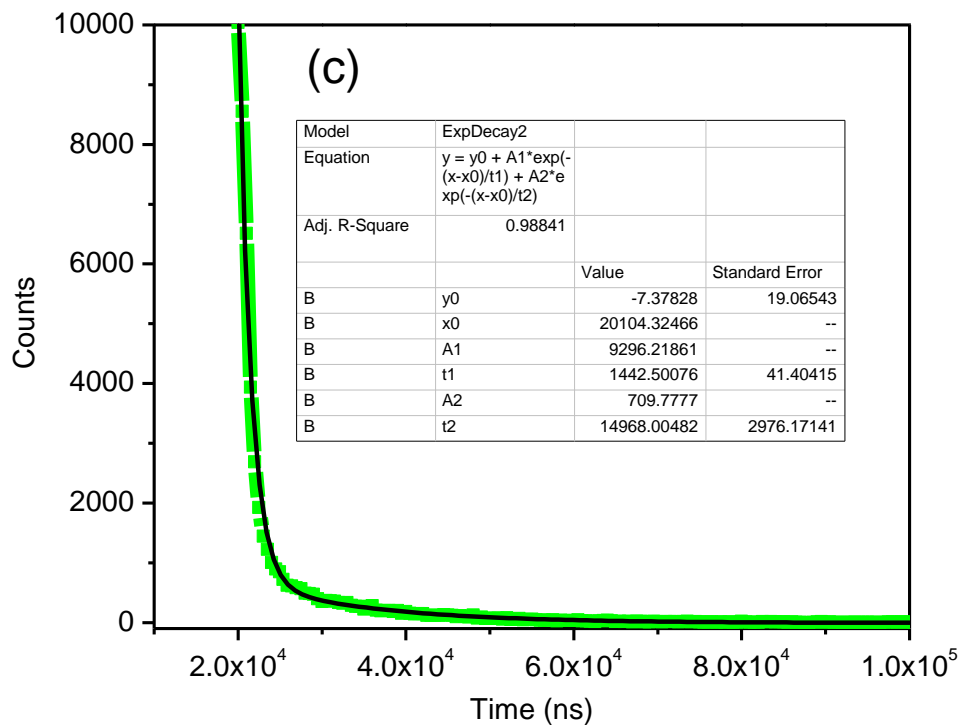

**Figure S5.** (a) is the decay profile of solid  $[\text{Sm}(\text{dbm})_3(\text{H}_2\text{O})]$  (b) is the decay profile of its hybrid film w/w 6% and (c) is the decay profile of hybrid film w/w 6% of  $[\text{Tb}(\text{dbm})_3(\text{H}_2\text{O})]$ .

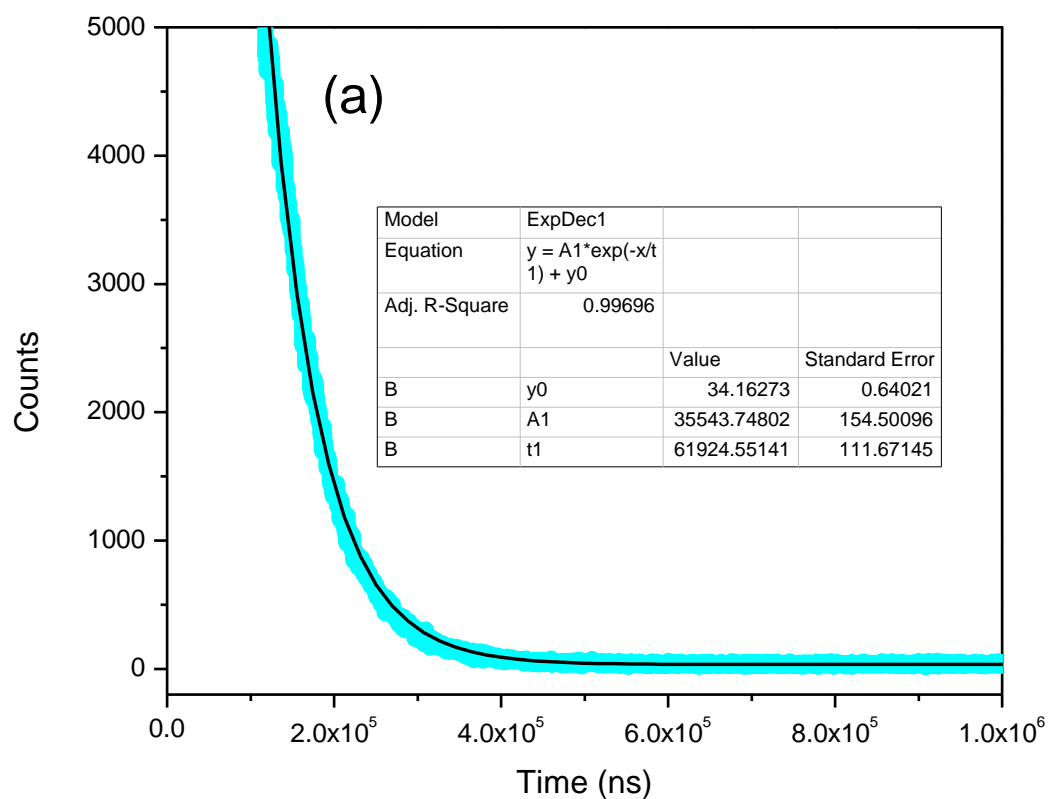

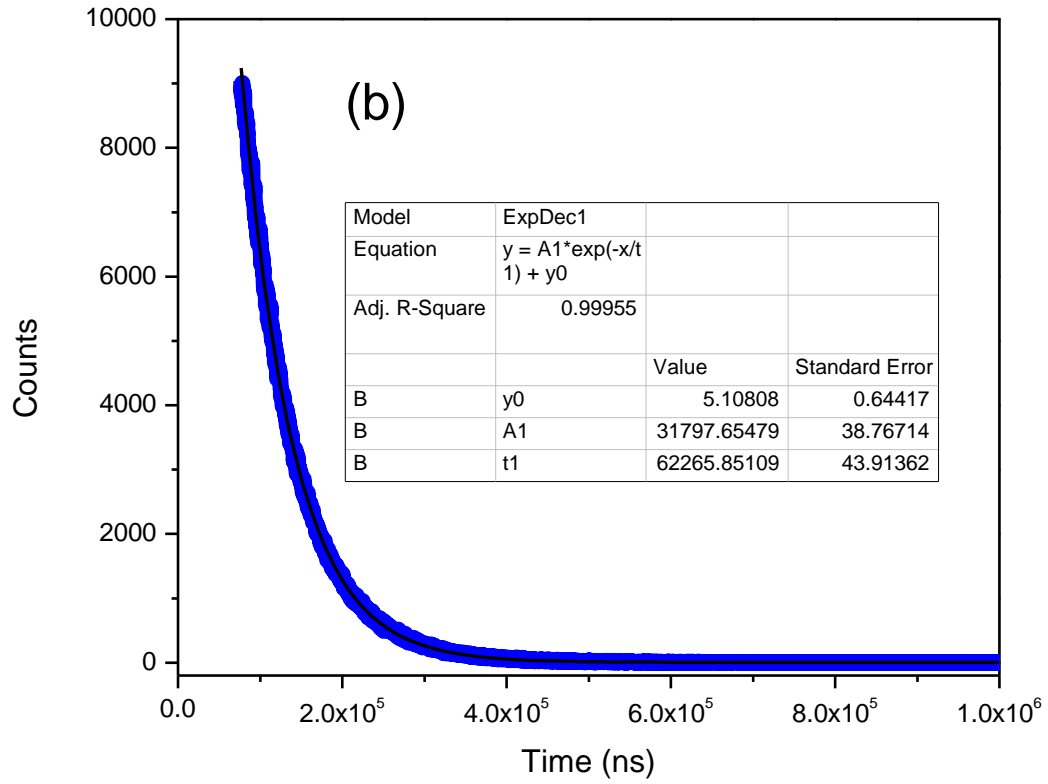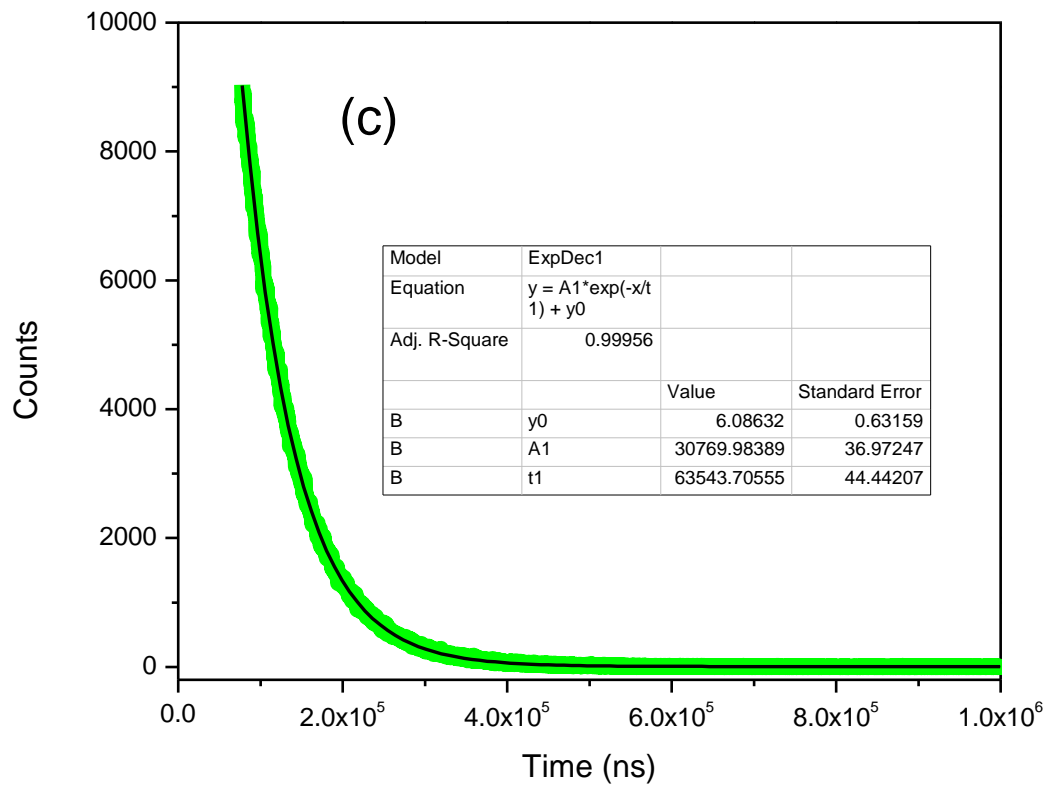



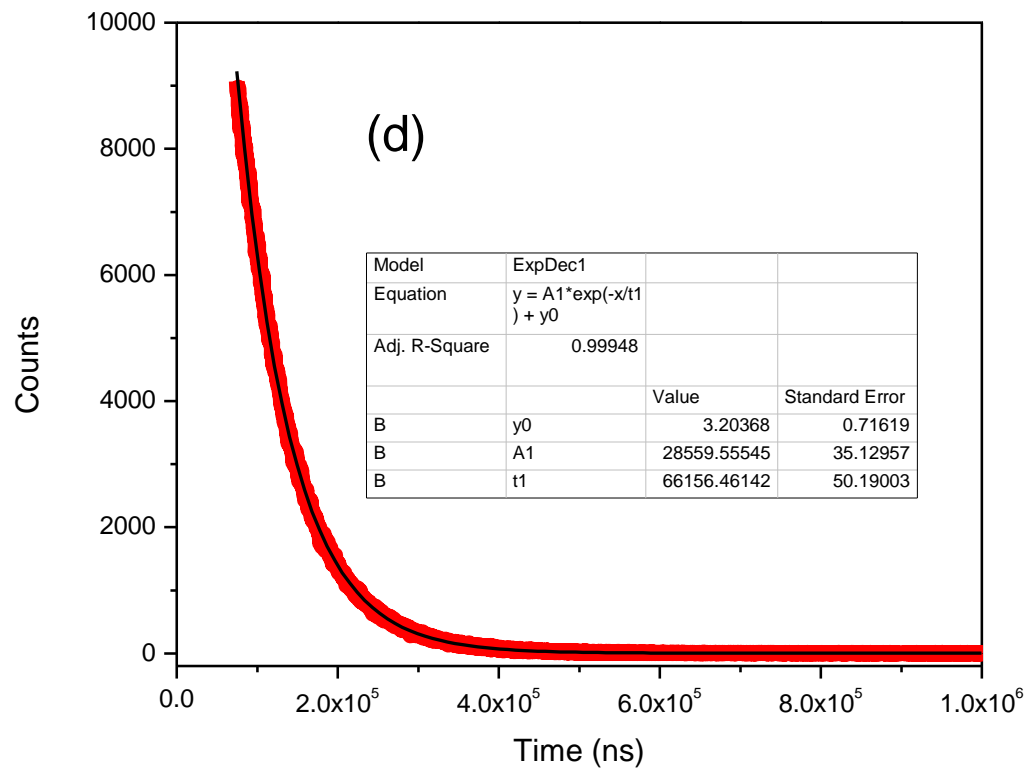

**Figure S6.** (a) is the decay profile of solid  $[\text{Sm}(\text{dbm})_3(\text{impy})]$  and (b), (c) and (d) are the decay profile of its hybrid films w/w 6%, 3% and 1.5% respectively.

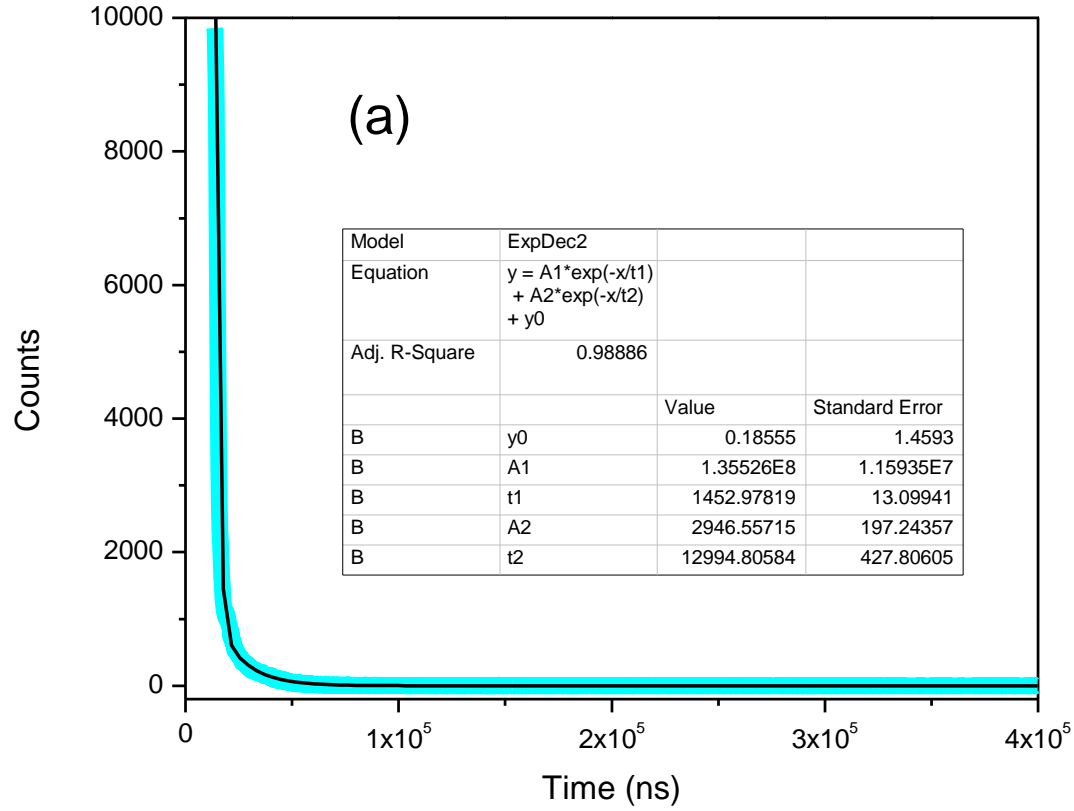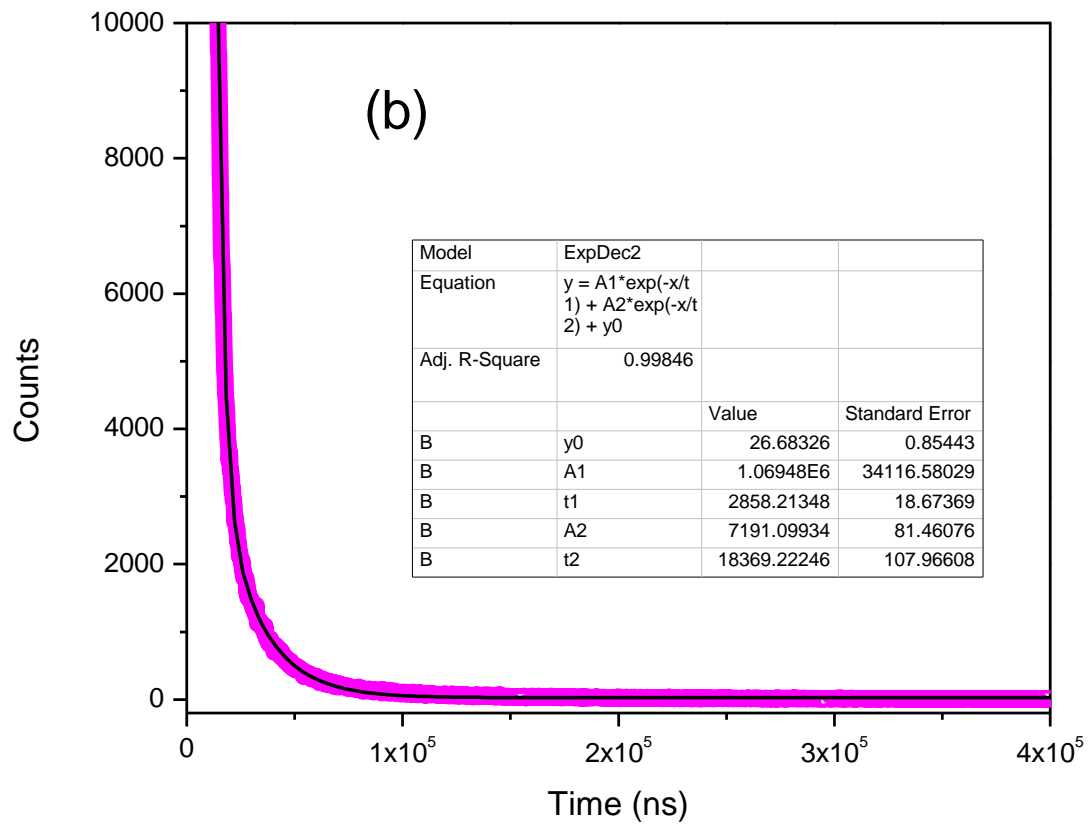

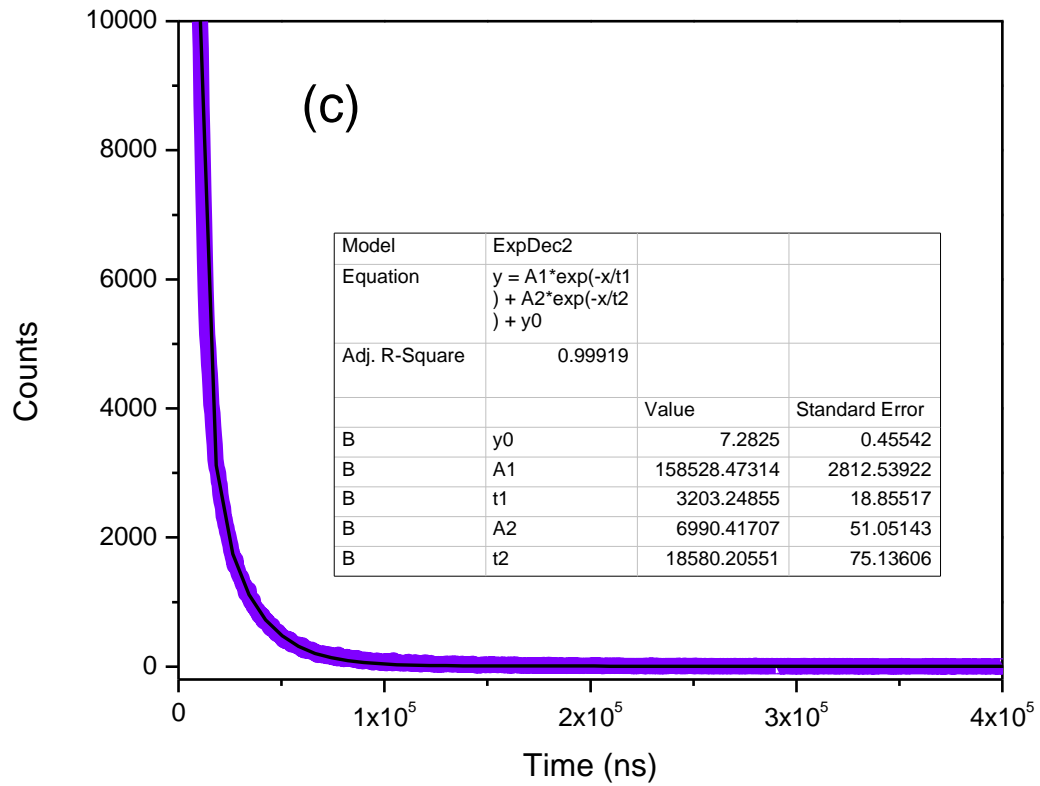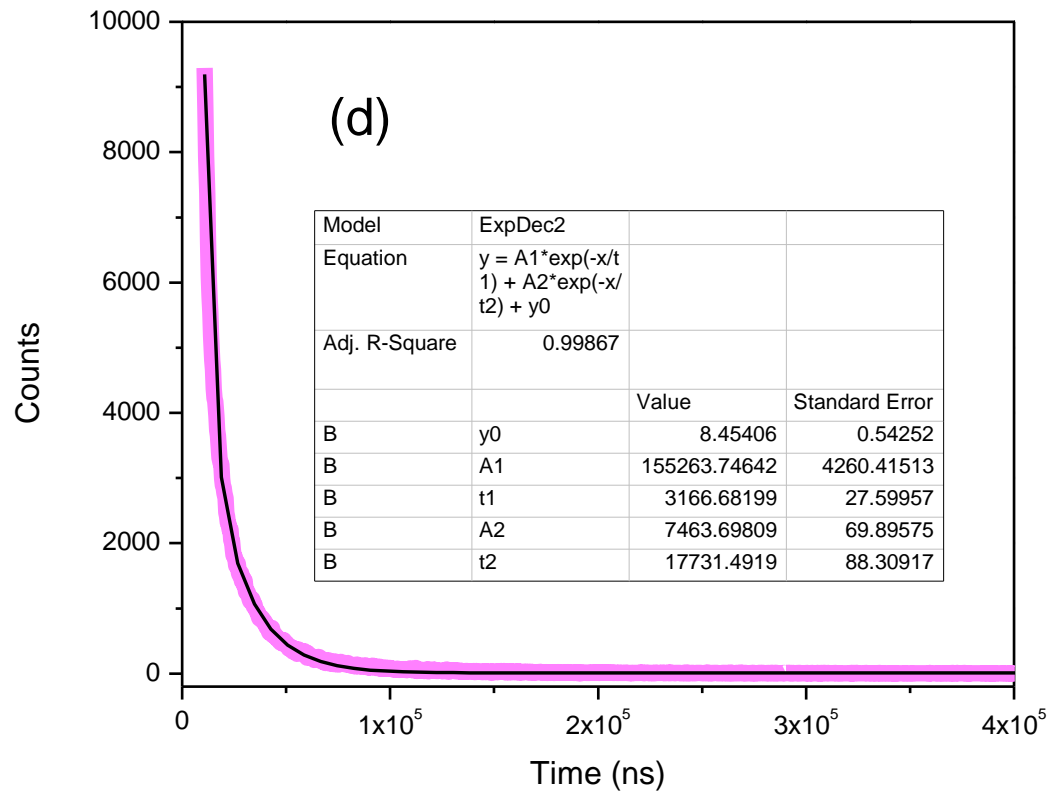

**Figure S7.** (a) is the decay profile of solid  $[Tb(dbm)_3(imp)]$  and (b), (c) and (d) are the decay profile of its hybrid films w/w 6%, 3% and 1.5% respectively.
